# Supplementary material for: Temperature-dependent properties of fat in adipose tissue from pork, beef and lamb. Part 2: rheology and texture
Source: Royal Society of Chemistry journal article supplement (doi:10.1039/d2fo00582d), 2022-01-01
Supplement: d2fo00582d1.pdf [file d2fo00582d1.pdf]

**Supplemental**

Supplemental Table 1: Back fat G' and G'' (A) and tan  $\delta$  (B) at key temperatures (n = 3).

| Back fat type and Temperature step | G' (kPa)        | G'' (kPa)     | Tan $\delta$ |
|------------------------------------|-----------------|---------------|--------------|
| <b>PBF</b>                         |                 |               |              |
| Heating to                         |                 |               |              |
| 5 °C                               | 255.0 ± 79.4    | 52.9 ± 19.9   | 0.20 ± 0.02  |
| 20 °C                              | 54.1 ± 10.9     | 14.8 ± 3.7    | 0.27 ± 0.03  |
| 30 °C                              | 20.7 ± 4.6      | 5.1 ± 1.1     | 0.25 ± 0.08  |
| 80 °C                              | 15.6 ± 4.0      | 1.5 ± 0.7     | 0.10 ± 0.04  |
| Cooling to                         |                 |               |              |
| 30 °C                              | 7.7 ± 4.0       | 0.7 ± 0.4     | 0.10 ± 0.01  |
| 20 °C                              | 9.8 ± 4.6       | 1.2 ± 0.5     | 0.13 ± 0.03  |
| 5 °C                               | 721.3 ± 358.5   | 120.6 ± 63.1  | 0.16 ± 0.01  |
| <b>BBF</b>                         |                 |               |              |
| Heating to                         |                 |               |              |
| 5 °C                               | 2,225.0 ± 903.6 | 516.0 ± 230.2 | 0.23 ± 0.02  |
| 20 °C                              | 430.3 ± 95.3    | 119.1 ± 26.7  | 0.28 ± 0.02  |
| 30 °C                              | 39.2 ± 18.1     | 12.4 ± 4.7    | 0.33 ± 0.03  |
| 80 °C                              | 8.2 ± 0.7       | 0.9 ± 0.1     | 0.11 ± 0.00  |
| Cooling to                         |                 |               |              |
| 30 °C                              | 6.0 ± 1.5       | 0.8 ± 0.1     | 0.13 ± 0.01  |
| 20 °C                              | 25.3 ± 2.1      | 4.1 ± 0.5     | 0.16 ± 0.01  |
| 5 °C                               | 461.7 ± 92.5    | 83.3 ± 14.0   | 0.18 ± 0.01  |
| <b>LBF</b>                         |                 |               |              |
| Heating to                         |                 |               |              |
| 5 °C                               | 1,820.0 ± 228.7 | 476.3 ± 39.8  | 0.26 ± 0.02  |
| 20 °C                              | 665.3 ± 63.0    | 197.3 ± 19.3  | 0.30 ± 0.01  |
| 30 °C                              | 104.1 ± 9.8     | 35.1 ± 4.8    | 0.34 ± 0.02  |
| 80 °C                              | 18.8 ± 7.4      | 2.4 ± 0.6     | 0.13 ± 0.03  |
| Cooling to                         |                 |               |              |
| 30 °C                              | 16.8 ± 7.9      | 2.4 ± 1.3     | 0.14 ± 0.01  |
| 20 °C                              | 67.5 ± 12.4     | 12.1 ± 1.9    | 0.18 ± 0.02  |
